# Supplementary material for: Multifunctional luminescent coordination polymers based on tricarboxylic acid for the detection of 2,4-dinitrophenol and iron(iii) and aluminum(iii) ions
Source: Royal Society of Chemistry journal article supplement (doi:10.1039/c8nj04046j), 2019-01-01
Supplement: c8nj04046j1.pdf [file c8nj04046j1.pdf]

**Multifunctional Luminescent Coordination Polymer Based on Tricarboxylic acid for  
Detections of 2,4-Dinitrophenol and Iron(III) and Aluminum(III) Ions**

**Mürsel Arici**

Department of Chemistry, Faculty of Arts and Sciences, Eskişehir Osmangazi University,  
26480 Eskişehir, Turkey

**Table S1.** Selected bond distance (Å), angle (°) and hydrogen-bond geometry data for **1**.

| <b>Bond Lengths (Å)</b>              |             |                                       |                       |                         |
|--------------------------------------|-------------|---------------------------------------|-----------------------|-------------------------|
| Zn1—O4 <sup>i</sup>                  | 1.992 (8)   | Zn1—O3 <sup>ii</sup>                  | 1.975 (8)             |                         |
| Zn1—O1                               | 1.934 (8)   | Zn1—N1                                | 2.015 (8)             |                         |
| <b>Angles (°)</b>                    |             |                                       |                       |                         |
| O4 <sup>i</sup> —Zn1—N1              | 104.0 (4)   | O1—Zn1—N1                             | 134.4 (4)             |                         |
| O1—Zn1—O4 <sup>i</sup>               | 100.8 (3)   | O3 <sup>ii</sup> —Zn1—O4 <sup>i</sup> | 108.6 (3)             |                         |
| O1—Zn1—O3 <sup>ii</sup>              | 110.2 (3)   | O3 <sup>ii</sup> —Zn1—N1              | 97.3 (3)              |                         |
| <b>Hydrogen-bond geometry (Å, °)</b> |             |                                       |                       |                         |
| <i>D</i> —H··· <i>A</i>              | <i>D</i> —H | H··· <i>A</i>                         | <i>D</i> ··· <i>A</i> | <i>D</i> —H··· <i>A</i> |
| O7—H7A···O2 <sup>v</sup>             | 0.85        | 1.91                                  | 2.744 (13)            | 165                     |
| O7—H7B···O1 <sup>vi</sup>            | 0.85        | 2.01                                  | 2.848 (13)            | 169                     |
| O5—H5A···O7                          | 0.82        | 1.75                                  | 2.53 (2)              | 159                     |

Symmetry codes: (i)  $-x+3/2, -y+1/2, -z+1$ ; (ii)  $x, y+1, z$ ; (v)  $x-1/2, -y+1/2, z+1/2$ ; (vi)  $-x+1, -y+1, -z+1$ .

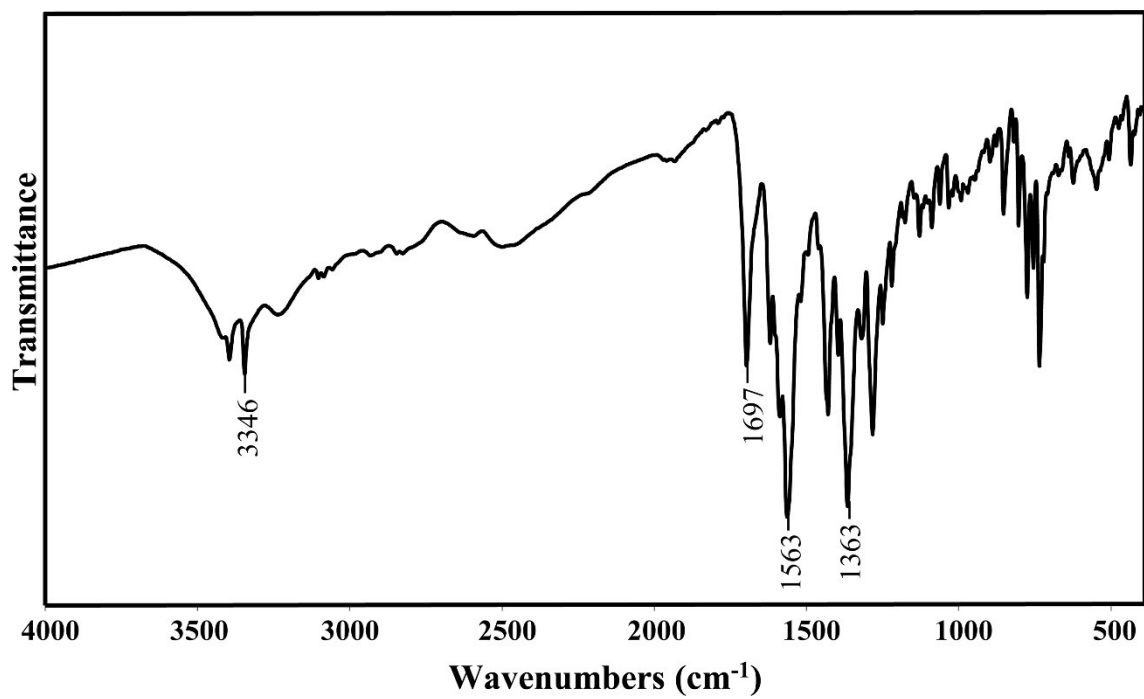

Fig. S1. IR spectrum of 1

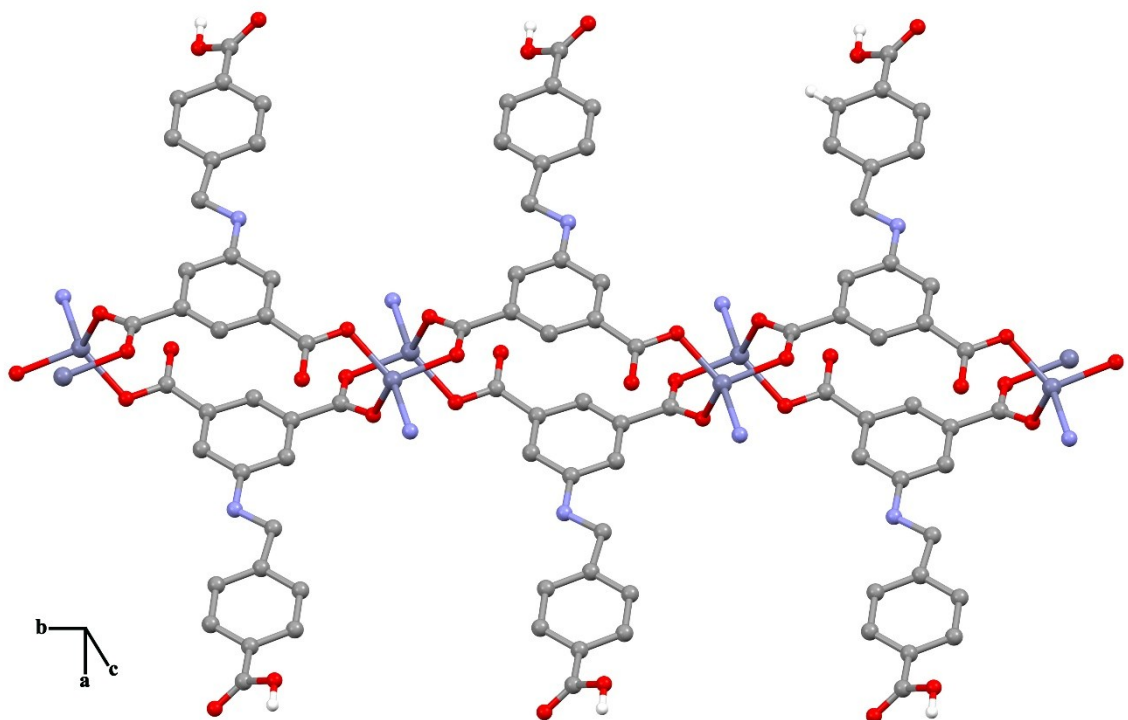

**Fig. S2.** 1D double chain of **1**

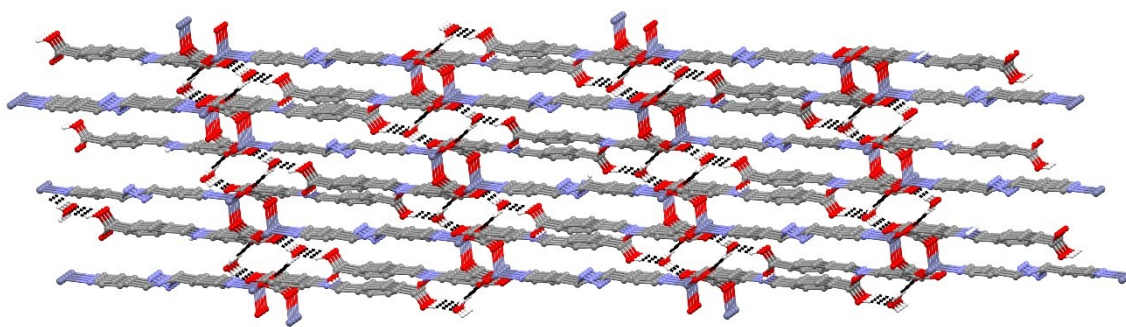

**Fig. S3.** 3D supramolecular structure of **1**

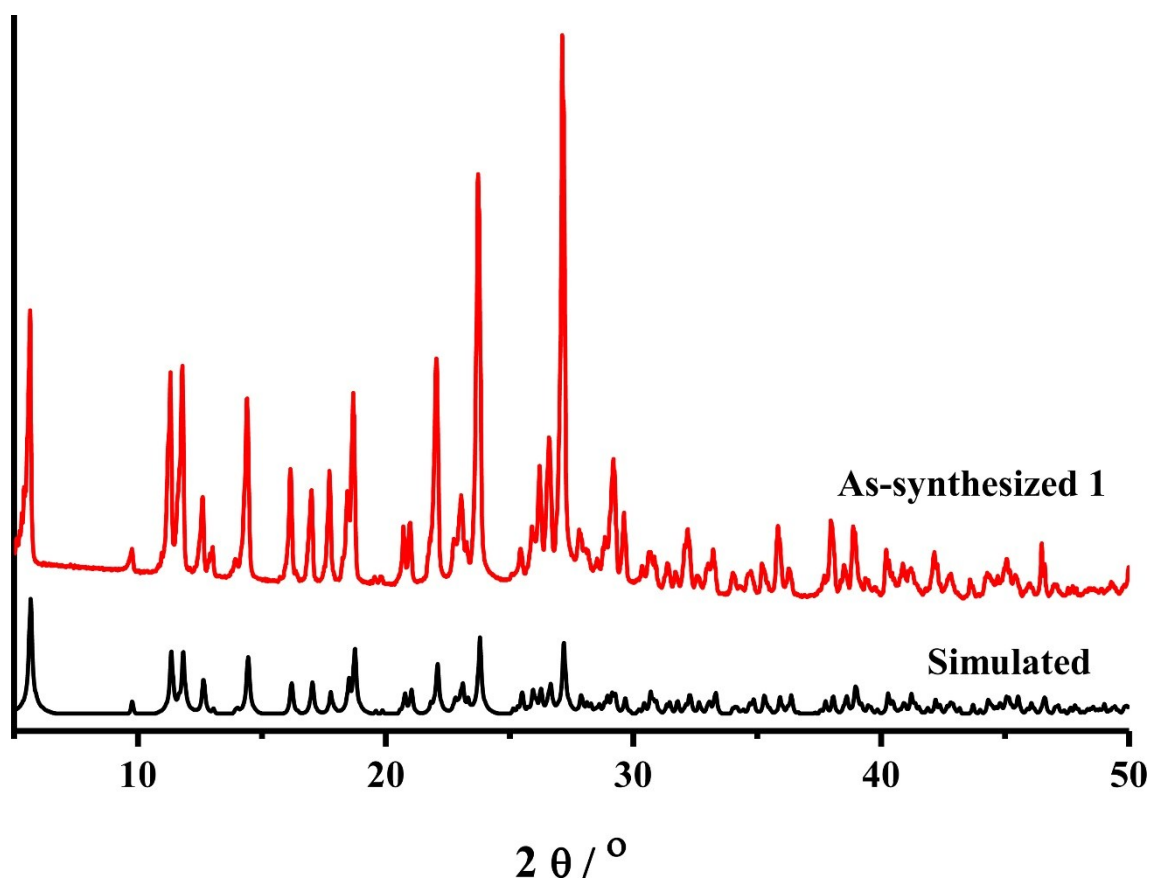

**Fig. S4.** PXRD patterns of simulated and as-synthesized 1

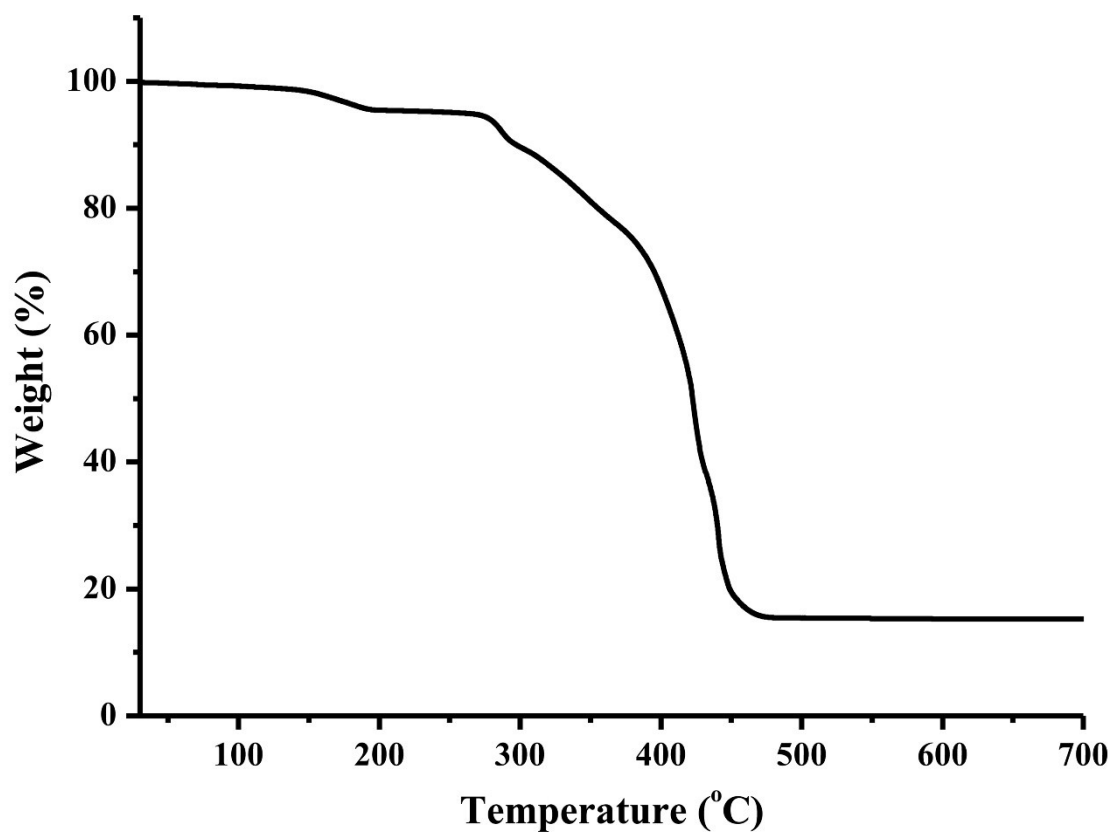

**Fig. S5.** TG curve of complex 1

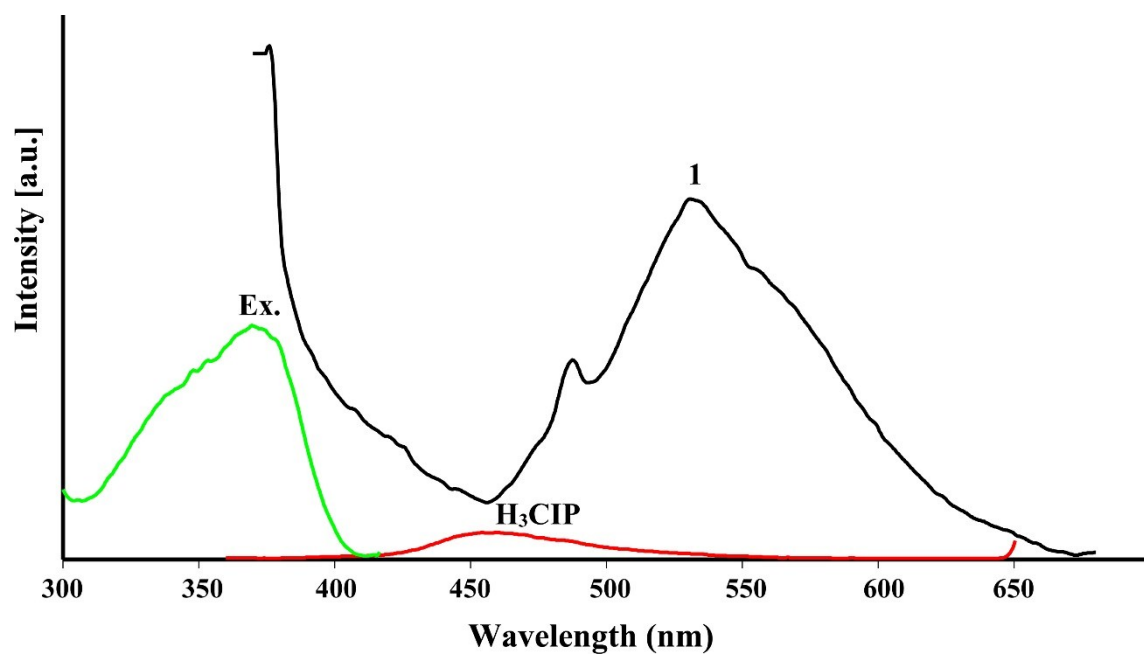

**Fig. S6.** Solid state excitation (Ex.) and emission spectra of free ligand H<sub>3</sub>CIP and complex **1**



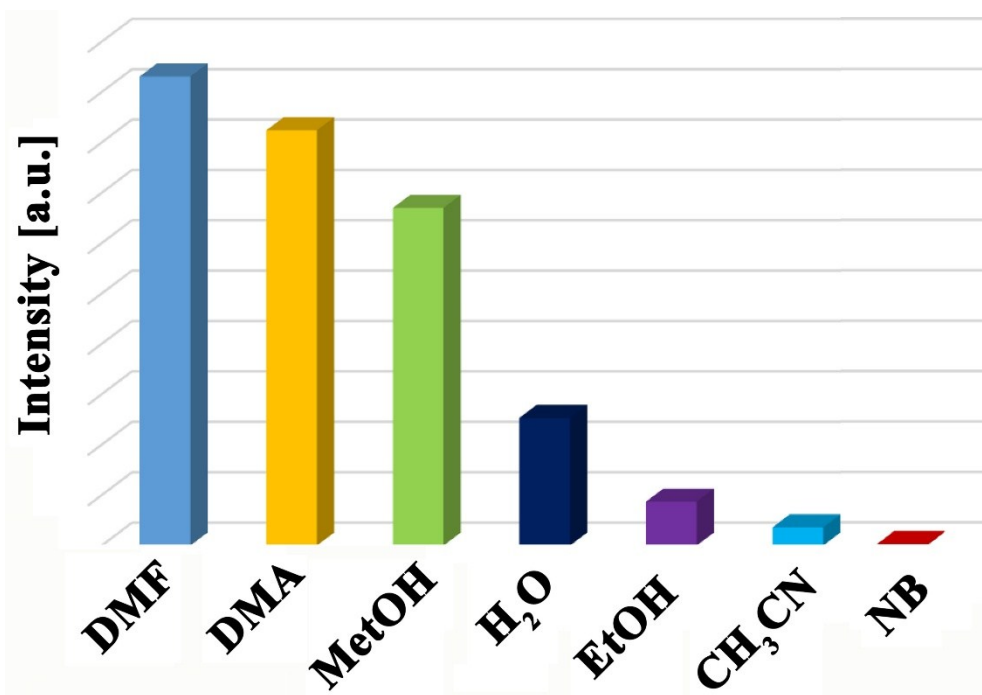

Fig. S7. A comparison of luminescence intensity of 1 dispersed in different organic solvents

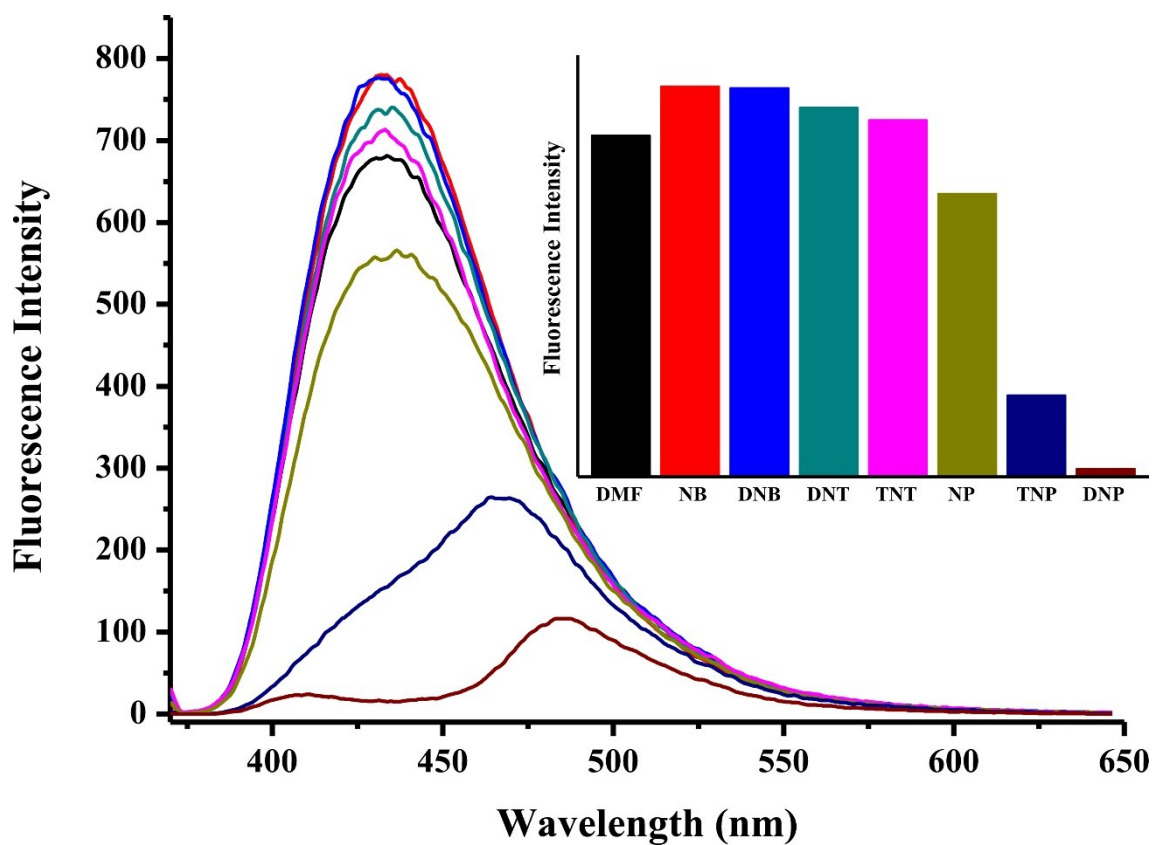

**Fig. S8.** Fluorescence spectra of complex **1** in the presence of various nitroaromatic compounds. Change of luminescence intensity histogram of **1** in the presence of different nitroaromatic compounds as a bar diagram (inset).

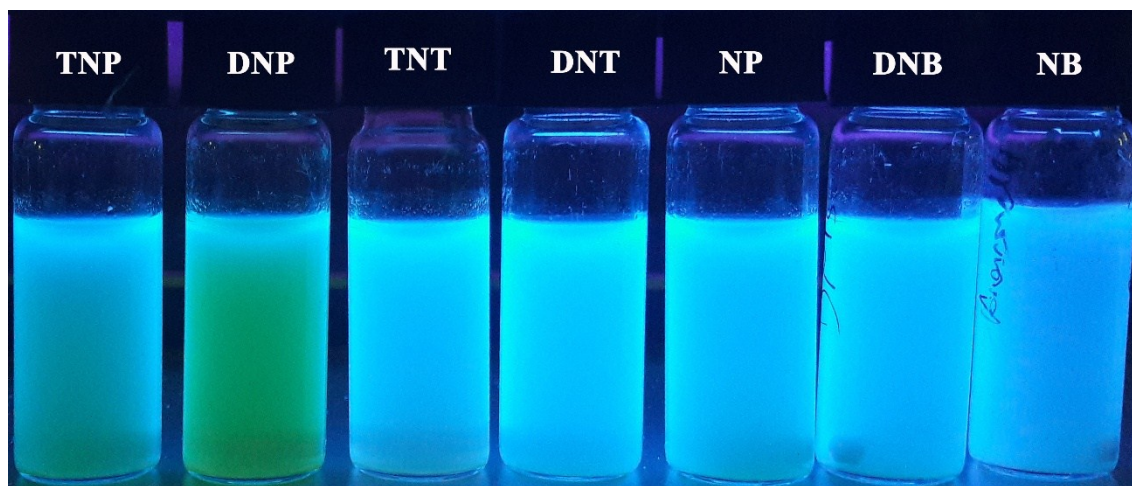

**Fig. S9.** The visual color changes of complex **1** dispersed in DMF after the addition of nitroaromatic compounds under UV-light

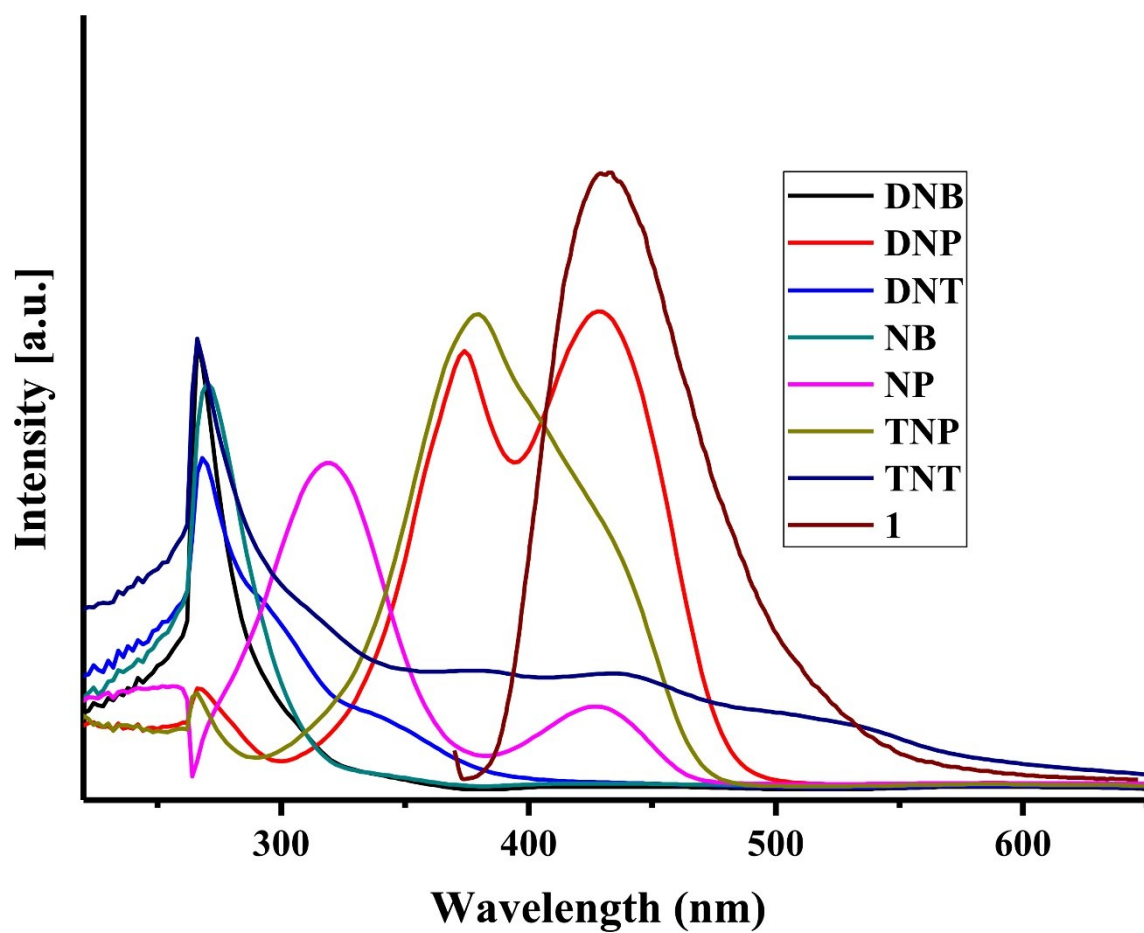

**Fig. S10.** Spectral overlap between the absorption spectra of nitroaromatic compounds and the emission spectrum of complex **1** in DMF

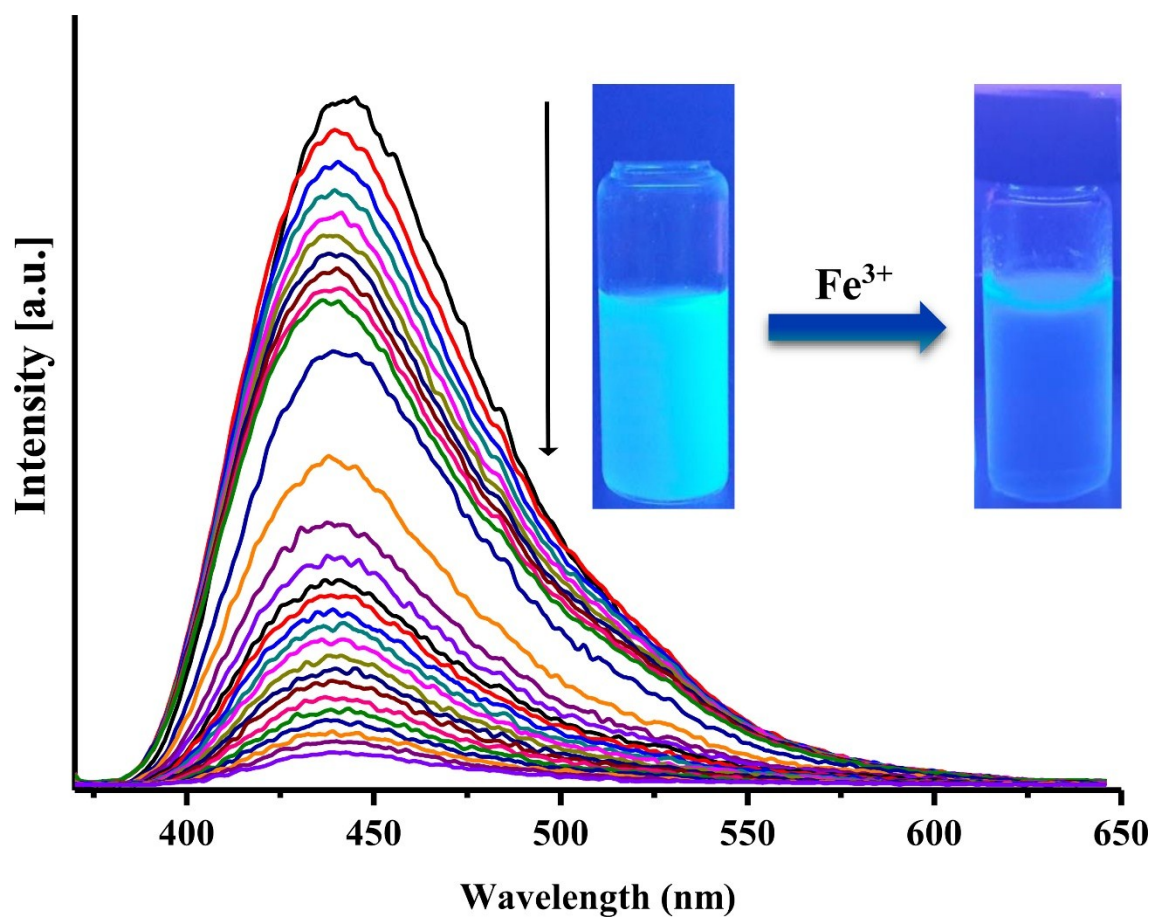

**Fig. S11.** Emission spectra of **1** dispersed in DMF upon incremental addition of Fe<sup>3+</sup> in DMF

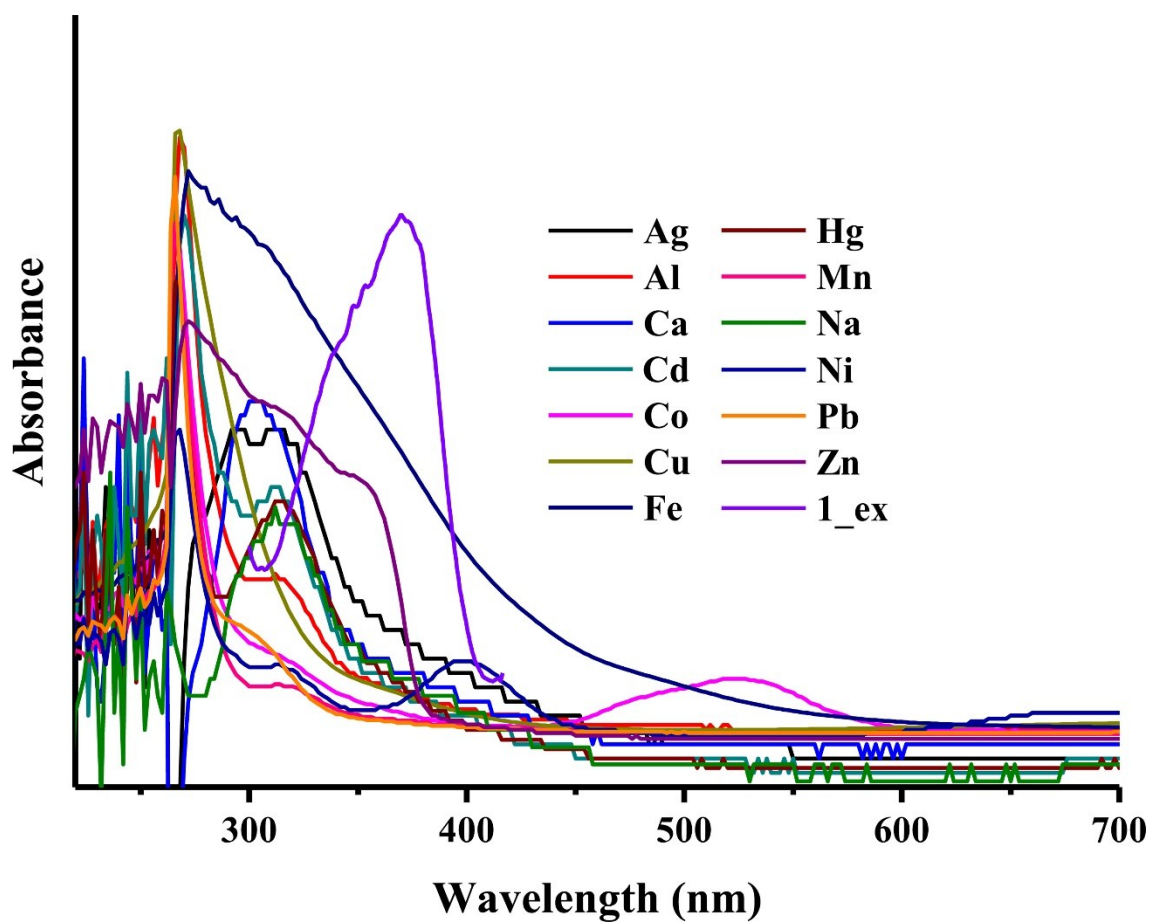

Fig. S12. The spectral overlap between absorption spectra of metal ion and excitation spectrum of **1** in DMF

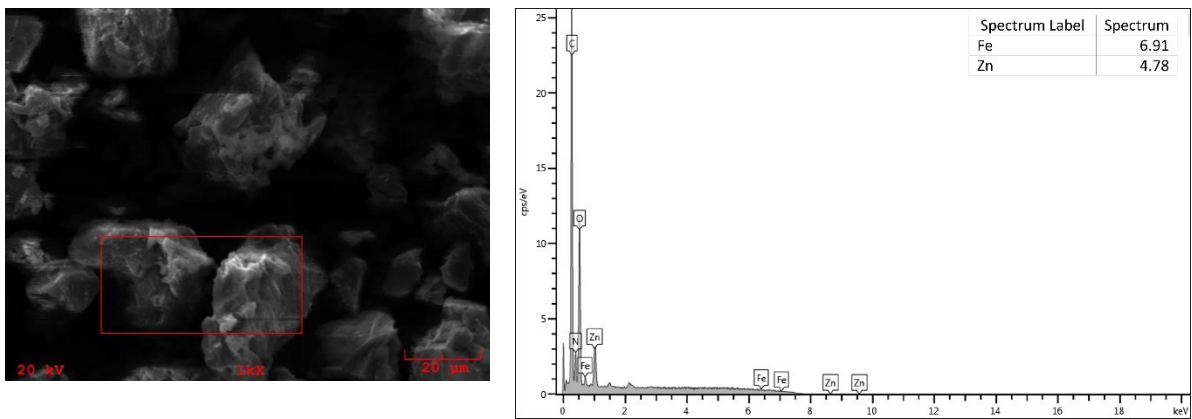

**Fig. S13.** SEM image and EDX spectrum of recovered complex **1** after immersed in  $\text{Fe}^{3+}$  solution.

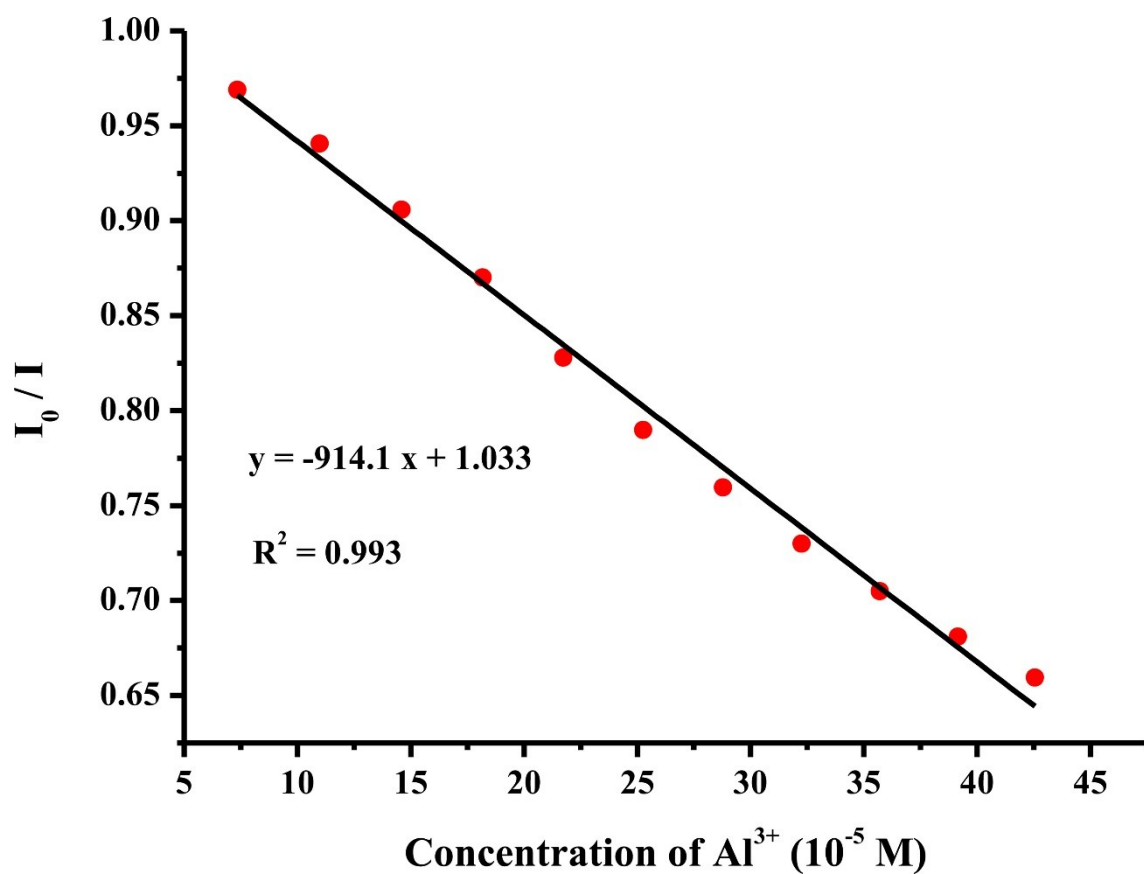

**Fig. S14.** Emission quenching linearity relationship at low concentration of  $Al^{3+}$



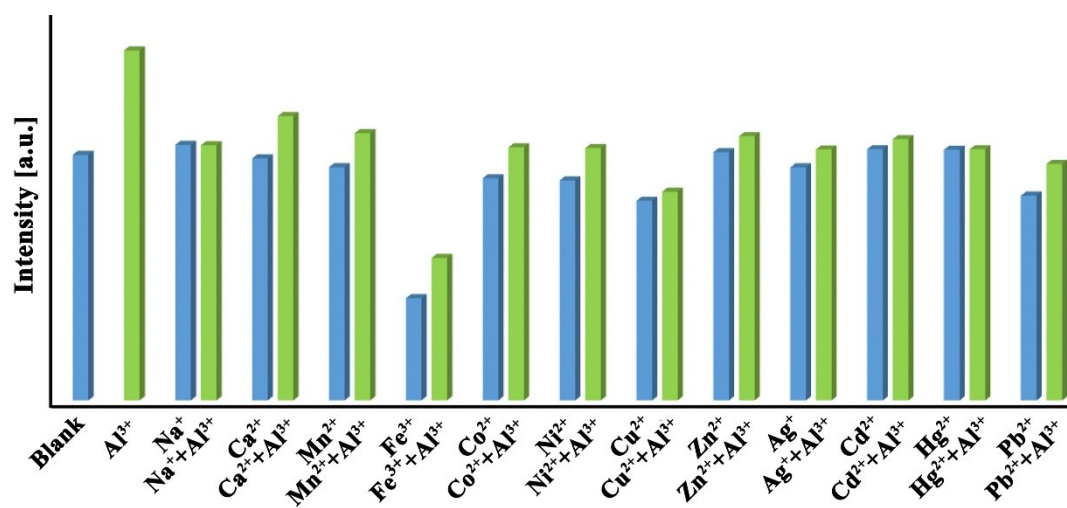

**Fig. S15.** Luminescence intensity histograms of **1** in the presence of various metal ions ( $10^{-2}$  M, 300  $\mu$ L) in DMF solution without and with Al<sup>3+</sup> ions ( $10^{-2}$  M, 300  $\mu$ L).

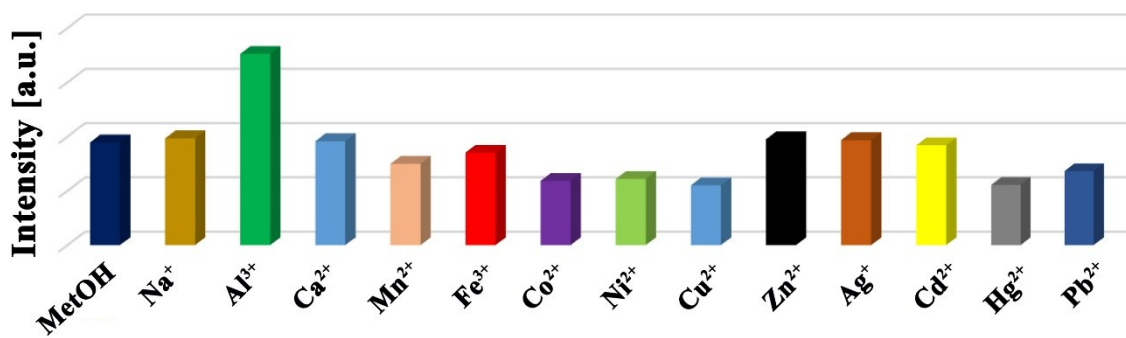

Fig. S16. Luminescence intensity histograms of complex **1** (3.0 mg, 2.7 mL) dispersed in methanol in the presence of different metal ions ( $10^{-3}$  M, 0.3 mL).

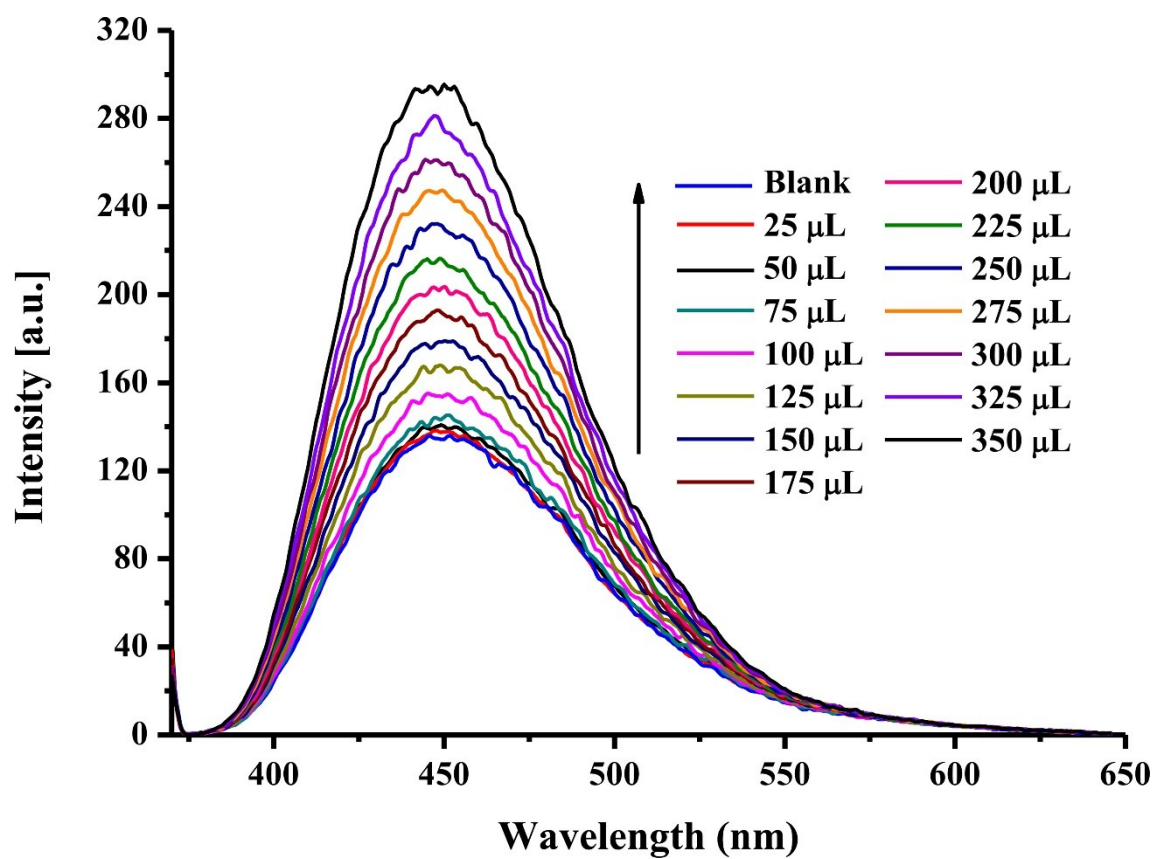

**Fig. S17.** Emission spectra of **1** dispersed in methanol upon incremental addition of Al<sup>3+</sup> in methanol

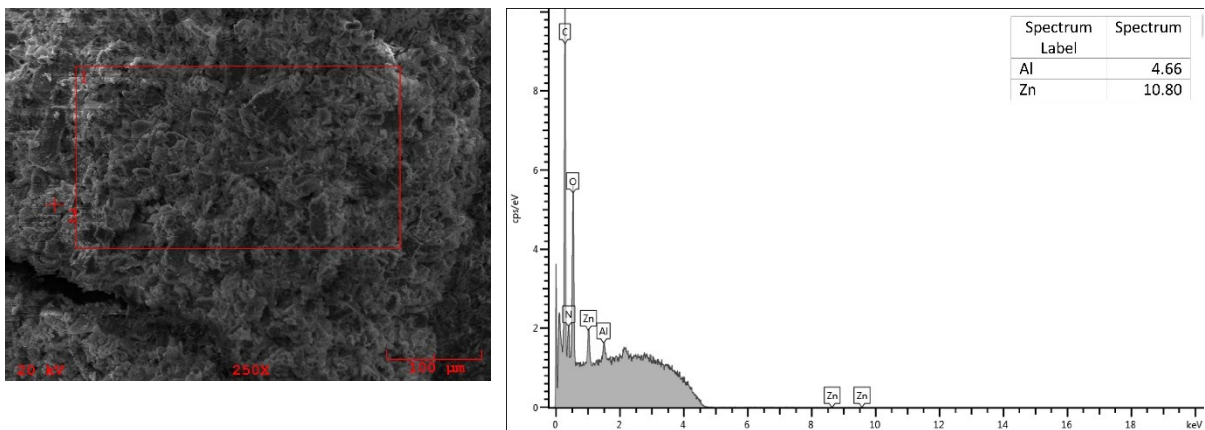

**Fig. S18.** SEM image and EDX spectrum of recovered complex after immersed in  $\text{Al}^{3+}$  solution.
